# Supplementary material for: Surface protein imputation from single cell transcriptomes by deep neural networks
Source: PubMed Central journal article supplement (PMC6994606; doi:10.1038/s41467-020-14391-0), 2020-01-31
Supplement: 41467_2020_14391_MOESM1_ESM.pdf [file 41467_2020_14391_MOESM1_ESM.pdf]

**Surface protein imputation from single cell transcriptomes by deep  
neural networks**

Zhou, et al.

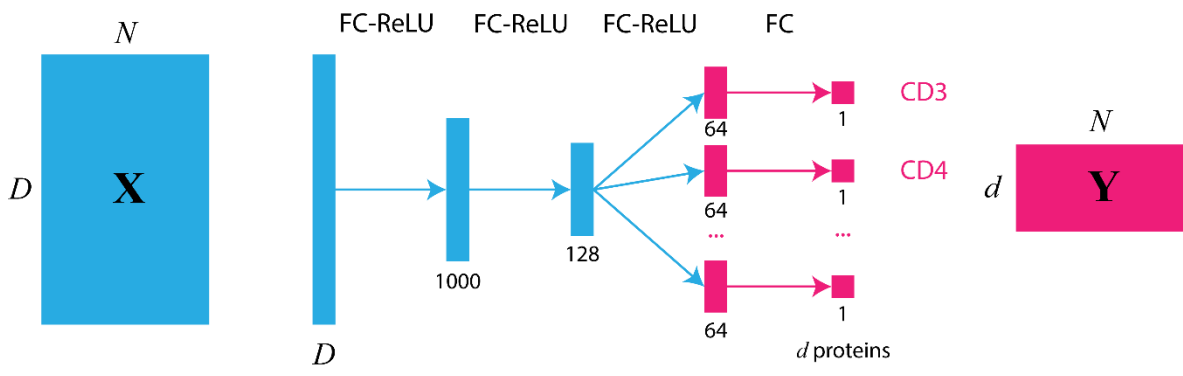

Supplementary Figure 1

Neural network architecture of the cTP-net.

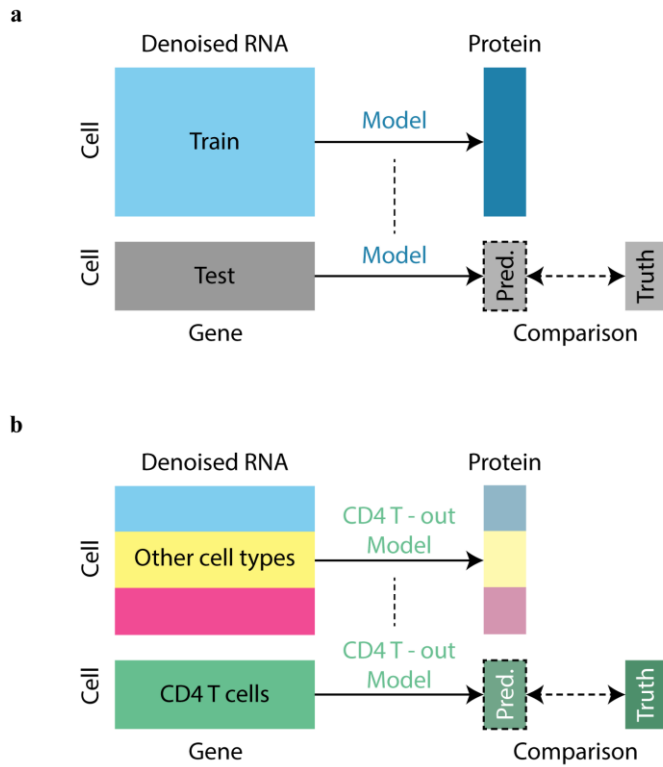

Supplementary Figure 2

Benchmark procedure.

(a) Holdout method validation scheme. (b) Out-of-cell-type benchmark scheme.

a

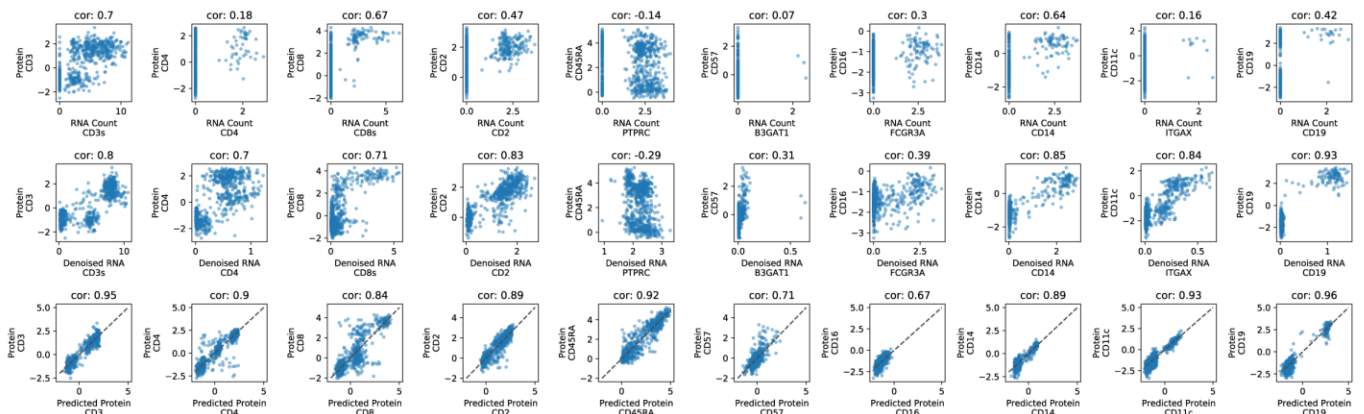

b

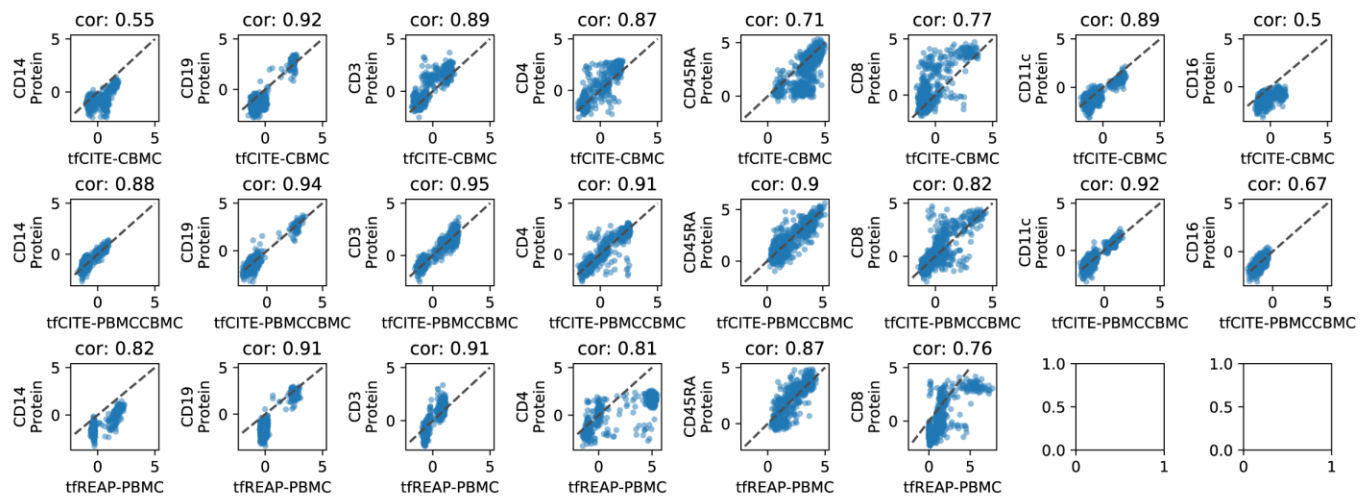

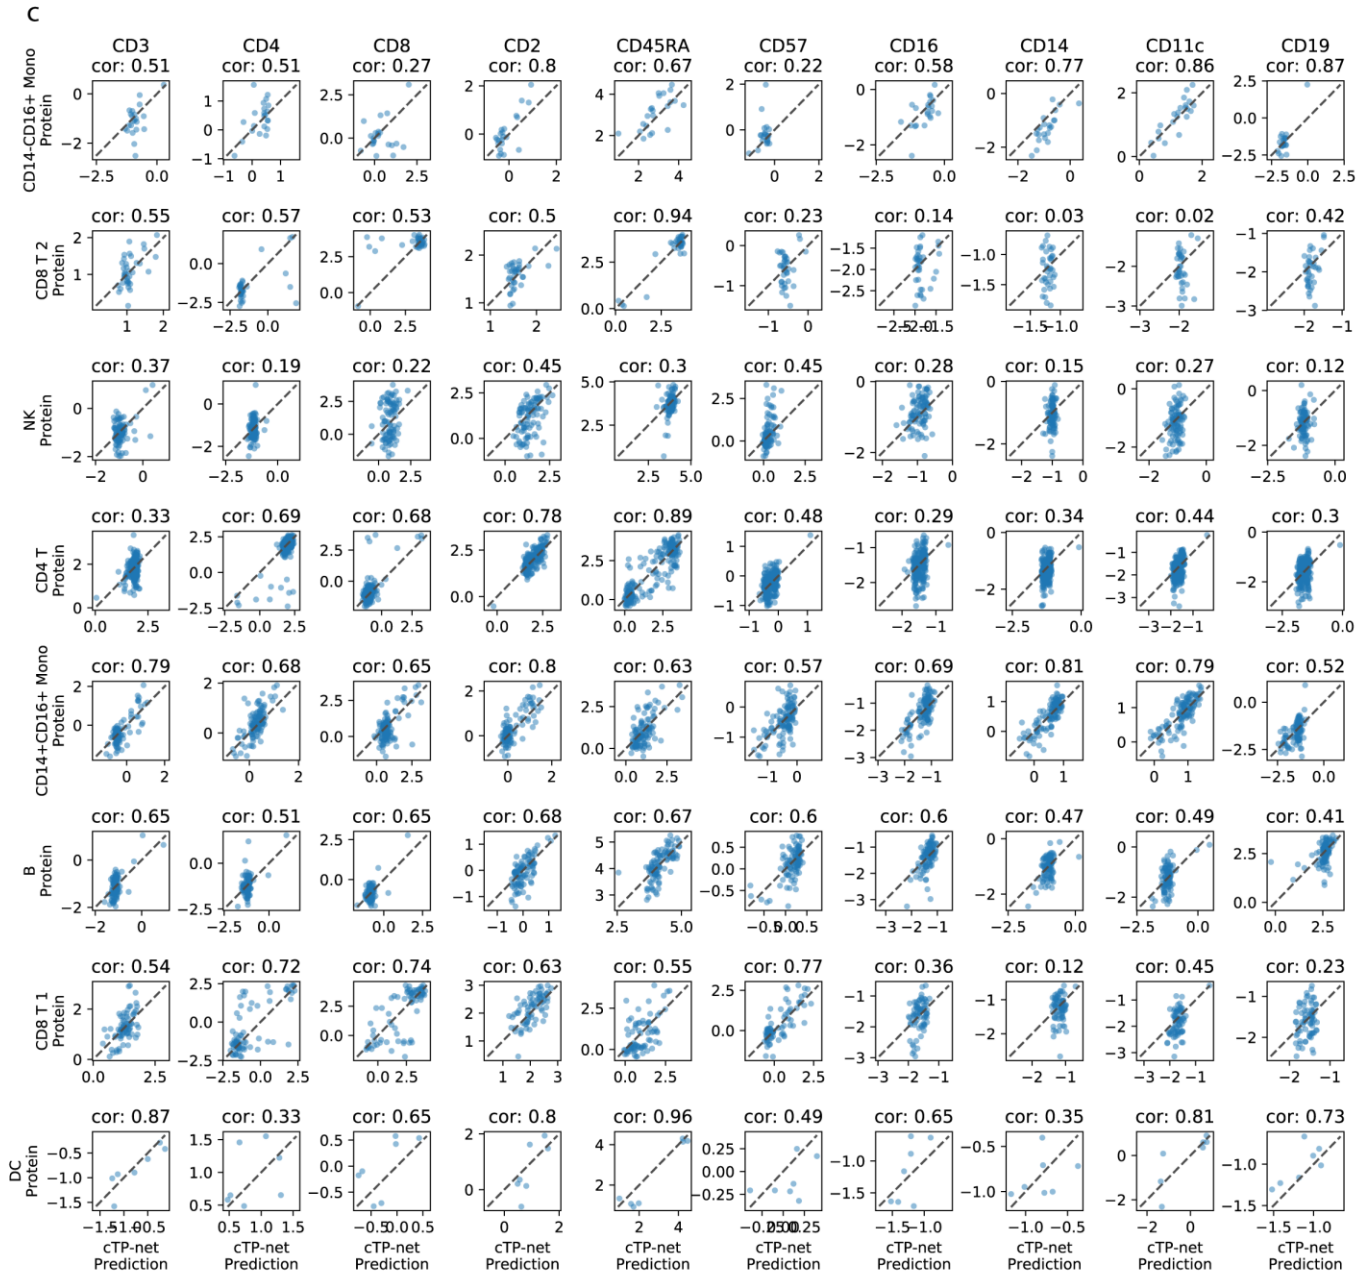

Supplementary Figure 3

Benchmark evaluation of cTP-net on CITE-PBMC data set.

(a) Benchmark correlation of true protein level vs. (1) Raw RNA count, (2) SAVER-X denoised RNA level, and (3) cTP-net predicted protein abundance in holdout method. (b) Benchmark correlation of truth protein level vs. (1) transfer learning from CITE-CBMC, (2) transfer learning from CITE-PBMCCBMC, and (3) transfer learning from REAP-PBMC. (c) Benchmark correlation of true protein level vs. cTP-net prediction in holdout method for each cell type.

a

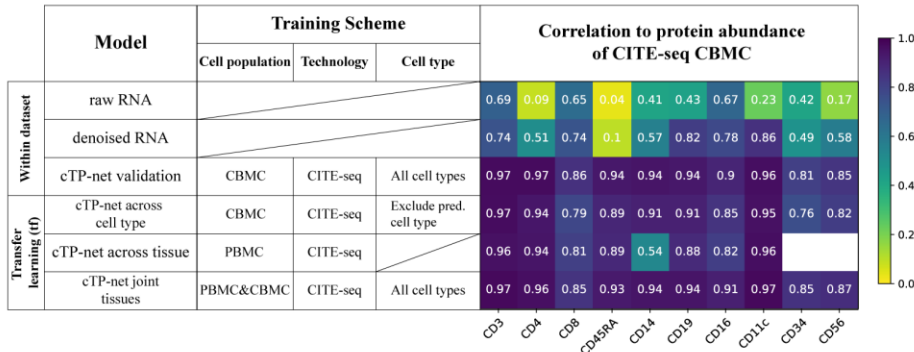

b

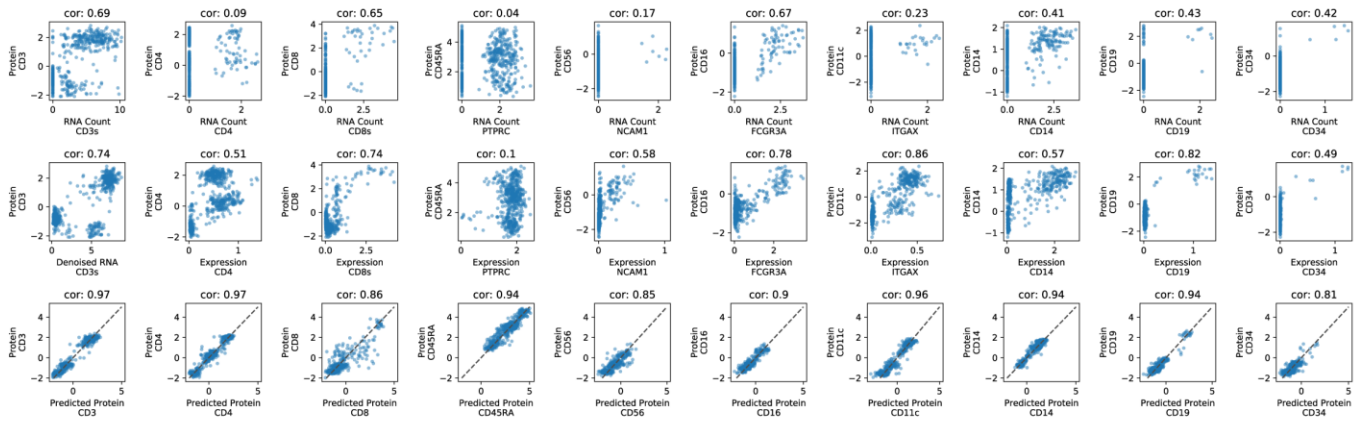

c

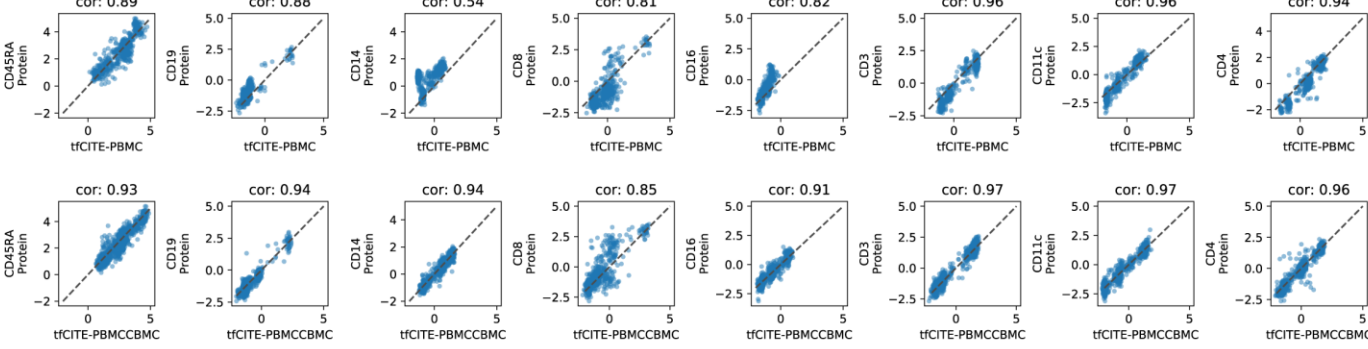

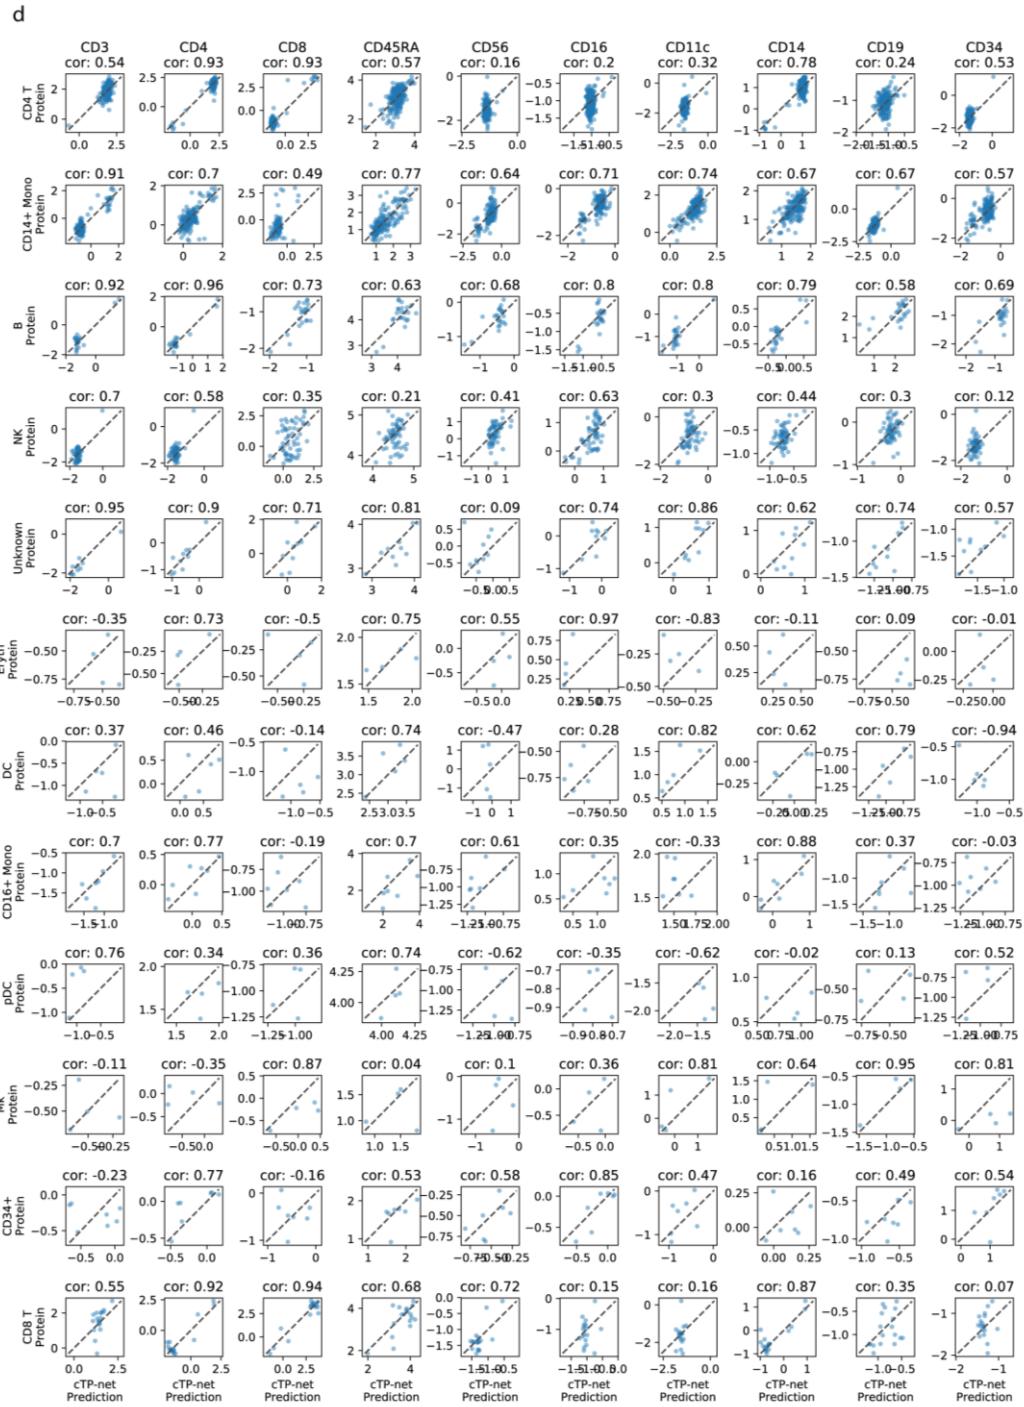

Supplementary Figure 4

Benchmark evaluation of cTP-net on CITE-CBMC data set.

**(a)** Benchmark evaluation heatmap of cTP-net and comparison with Seurat v3. The table on the left captures the detailed training scheme and model name of each test. **(b)** Benchmark correlation of true protein level vs. (1) Raw RNA count, (2) SAVER-X denoised RNA level, and (3) cTP-net predicted protein abundance in holdout method. **(c)** Benchmark correlation of truth protein level vs. (1) transfer learning from CITE-PBMC, and (2) transfer learning from CITE-PBMCCBMC. **(d)** Benchmark correlation of true protein level vs. cTP-net prediction in holdout method for each cell type.

a

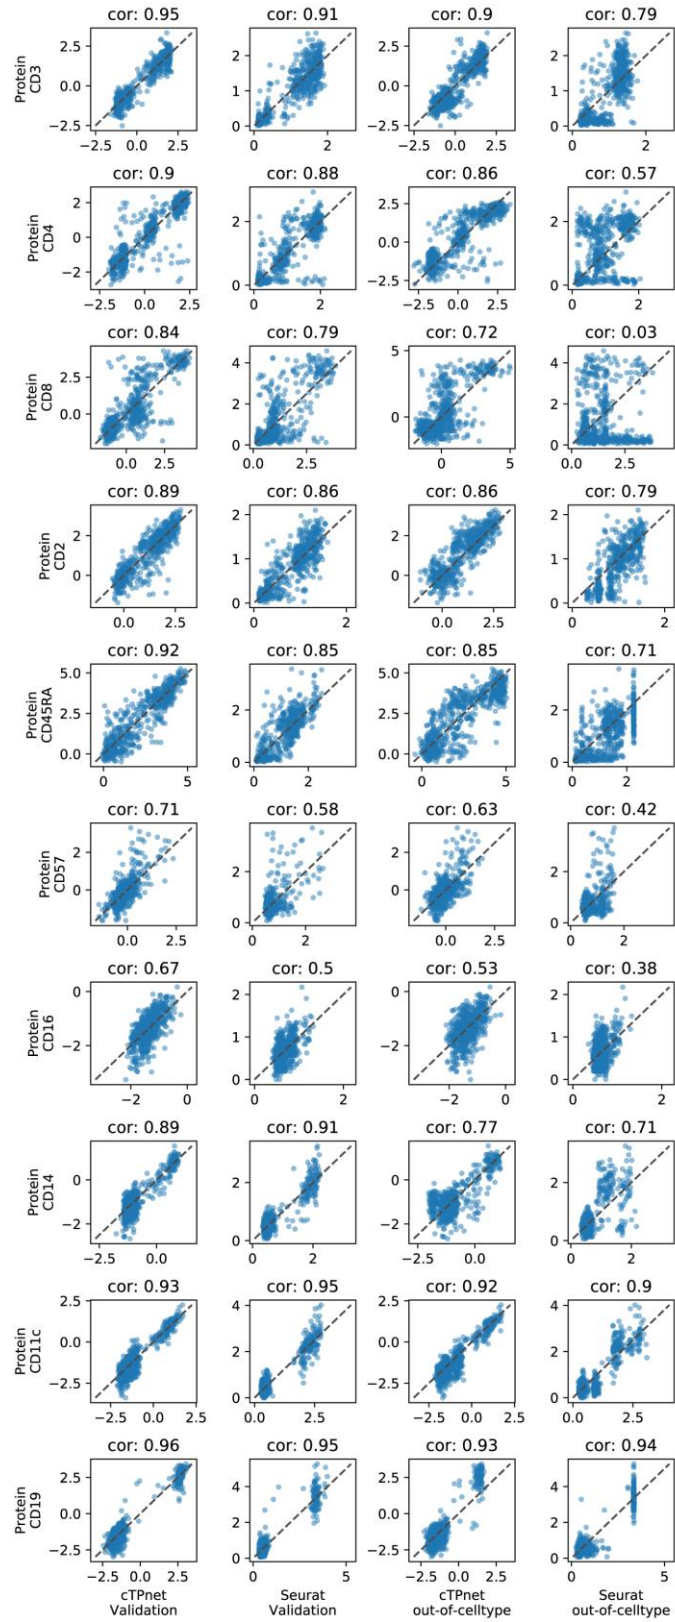



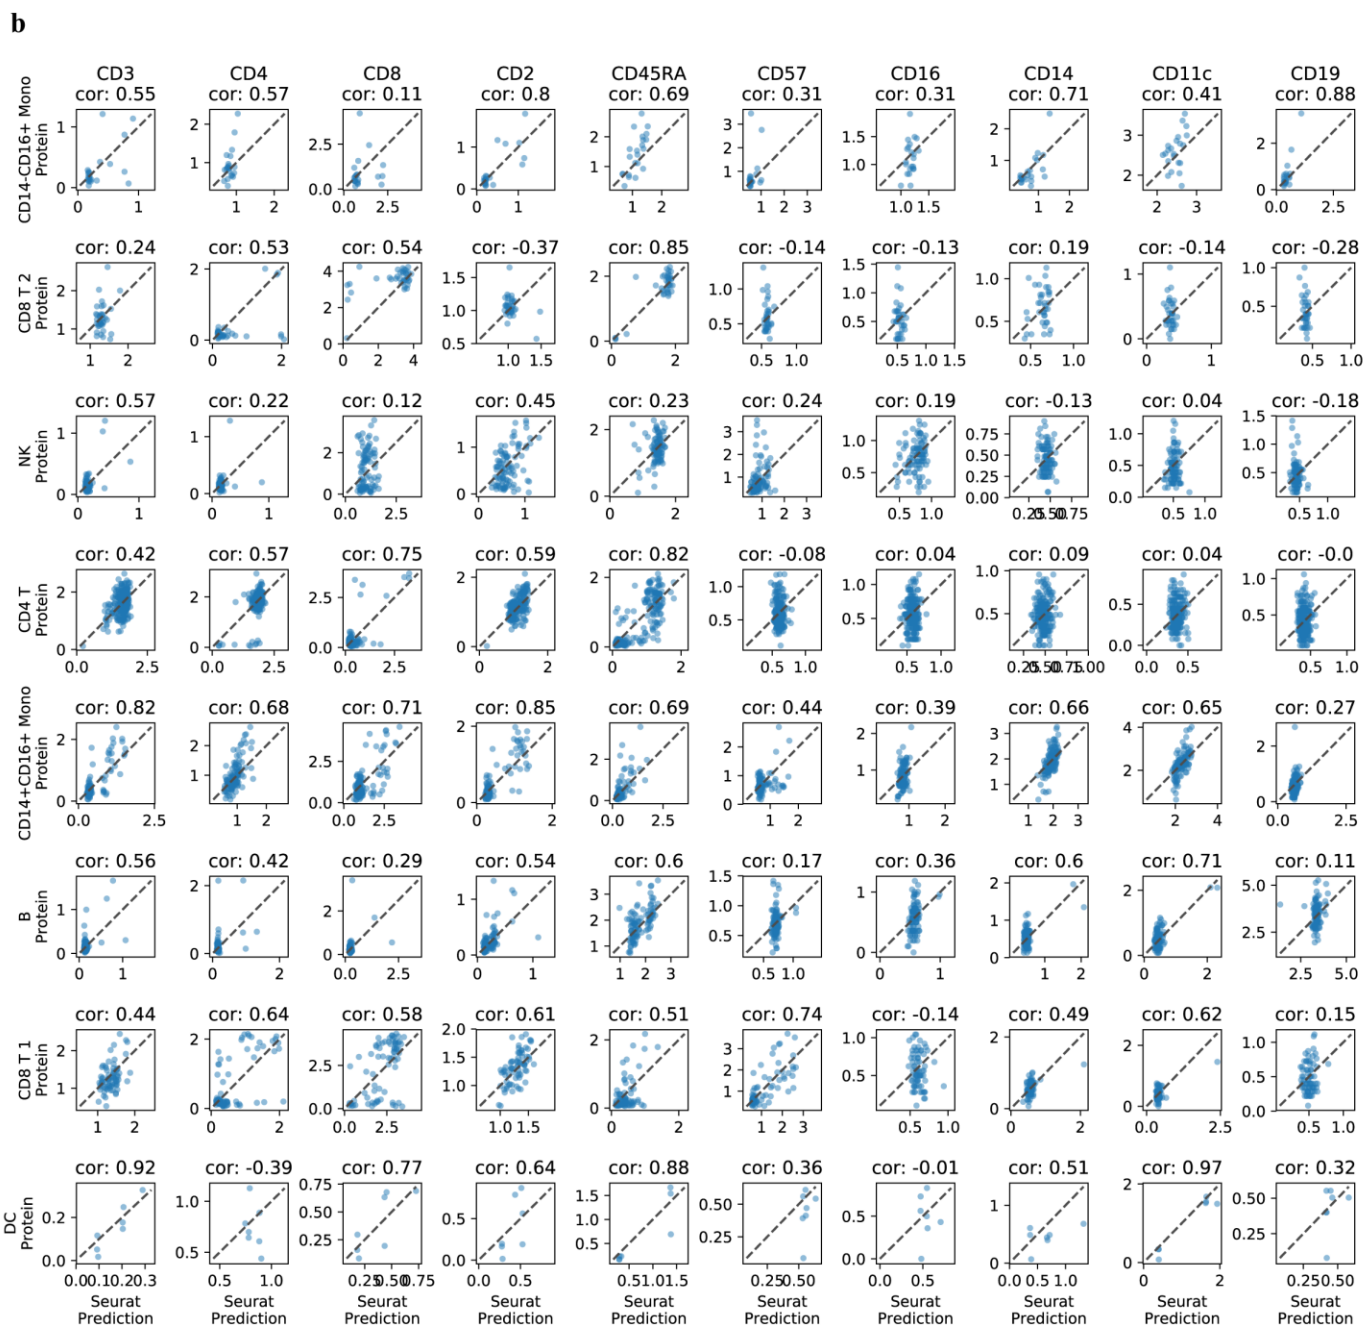

Supplementary Figure 5

Benchmark evaluation of Seurat v3 on CITE-PBMC data set.

**(a)** Benchmark correlation of true protein level vs. (1) cTP-net predicted protein abundance in holdout method, (2) Seurat v3 predicted protein abundance in holdout method, (3) out-of-cell-type cTP-net predicted protein abundance, and (4) out-of-cell-type Seurat v3 predicted protein abundance. **(b)** Benchmark correlation of truth protein level vs. (1) transfer learning from CITE-PBMC, and (2) transfer learning from CITE-PBMCCBMC. **(c)** Benchmark correlation of true protein level vs. cTP-net prediction in holdout method for each cell type.

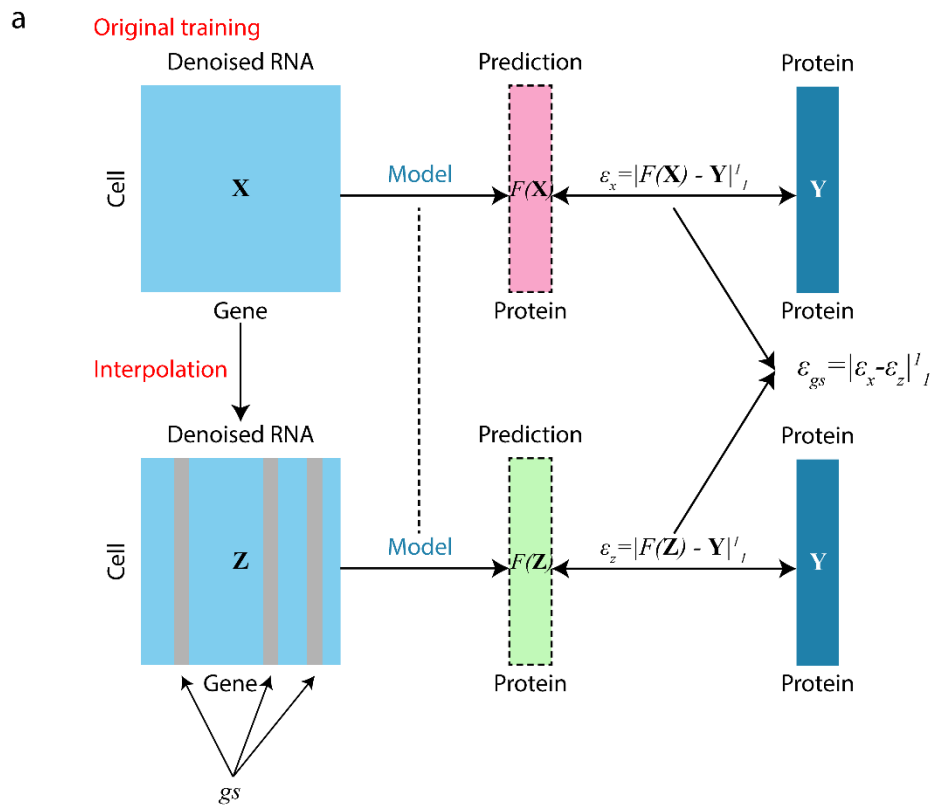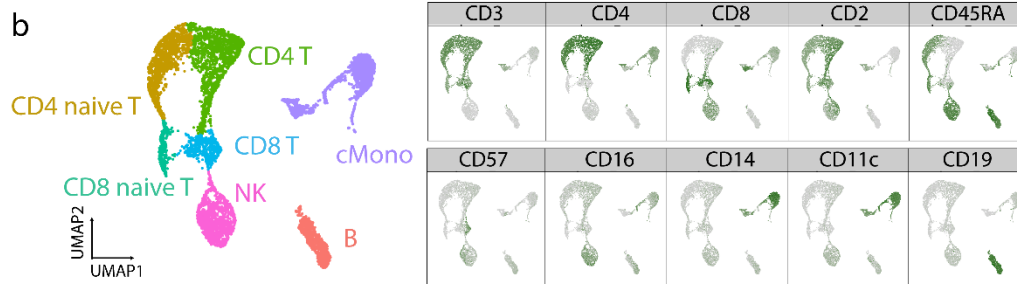

Supplementary Figure 6

Interpolation analysis.

**(a)** Interpolation procedure in identify permutation based importance score for each gene in each protein prediction. **(b)** Dimension reduction analysis on the bottleneck layer on cTP-net trained on PBMCs from CITE-seq.

**a**

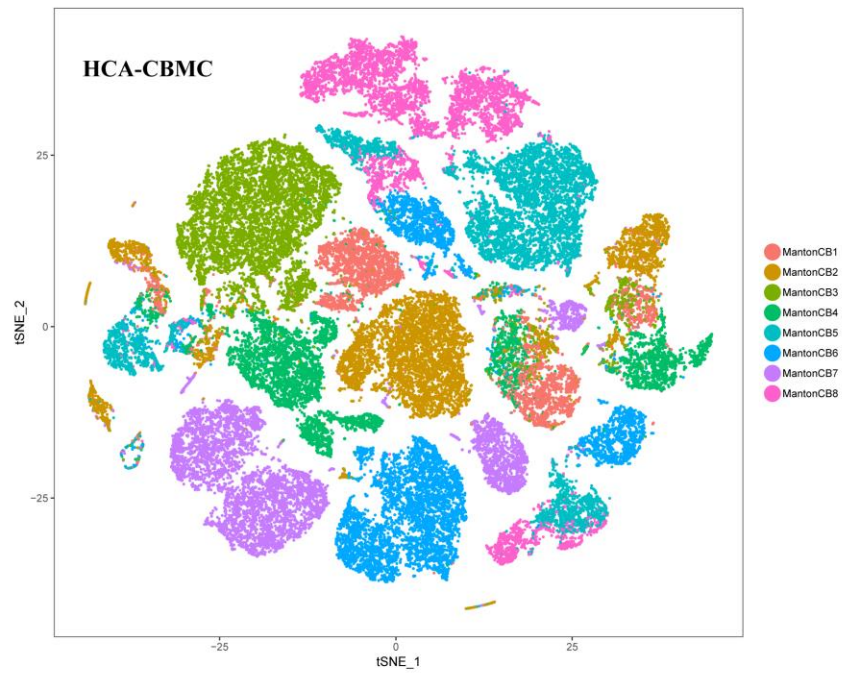

**b**

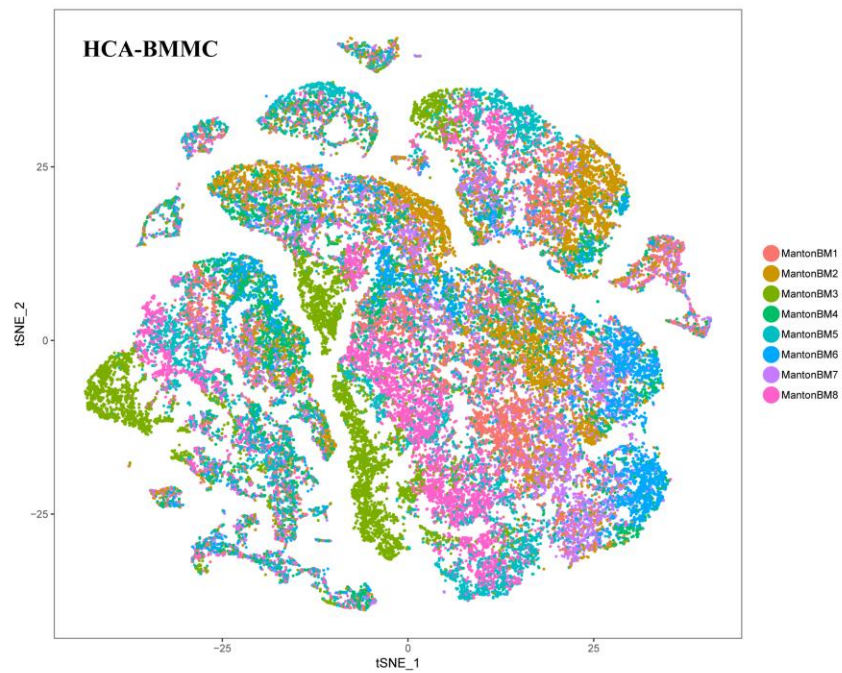

Supplementary Figure 7

Human Cell Atlas t-SNE plot based on normalized expression.

**(a)** t-SNE plot on Human Cell Atlas CBMCs based on normalized expression. Color indicates sample IDs. **(b)** t-SNE plot on Human Cell Atlas BMMCs based on normalized expression. Color indicates sample IDs. Strong batch effects observed in both data sets.

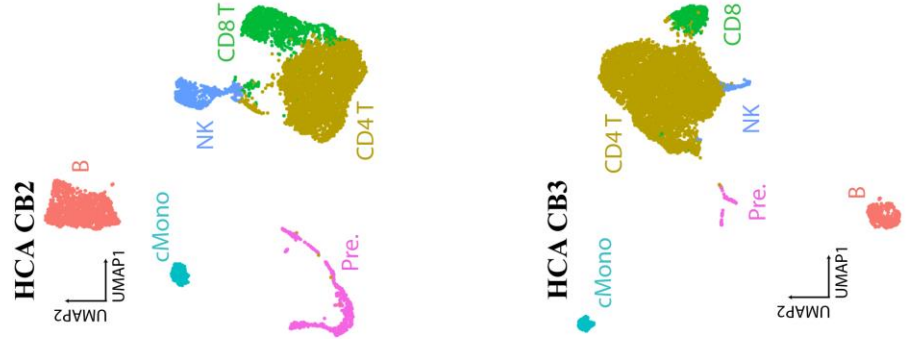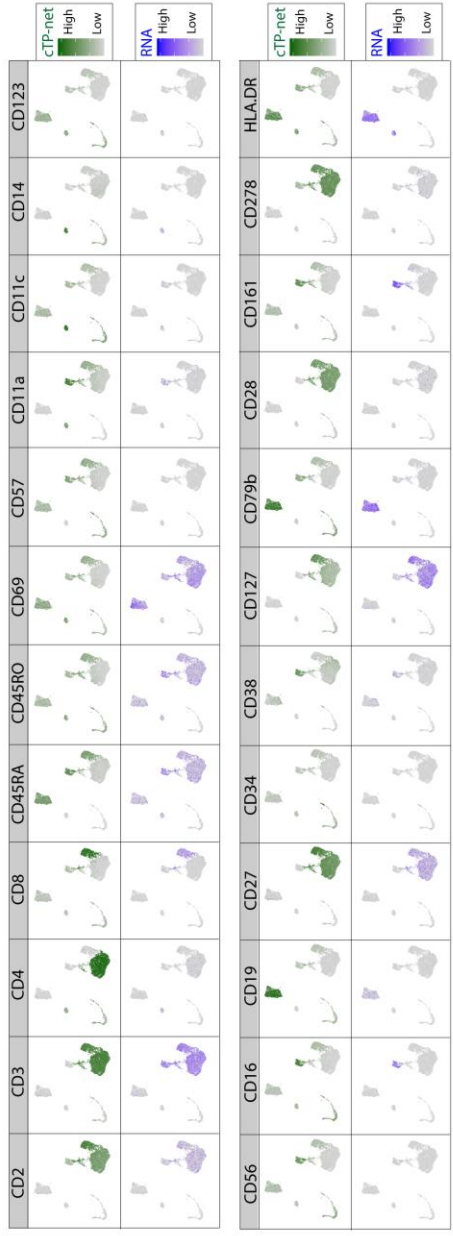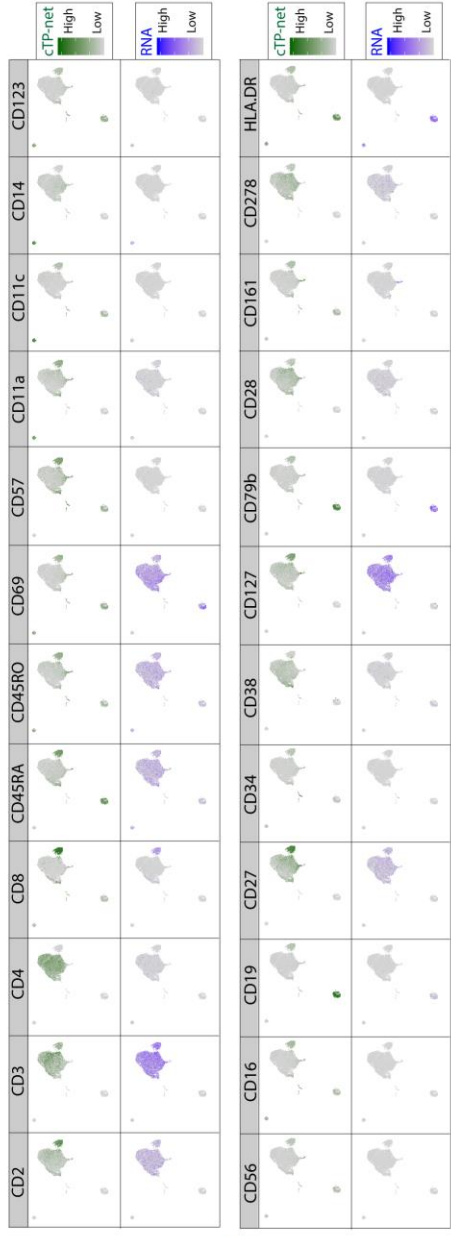

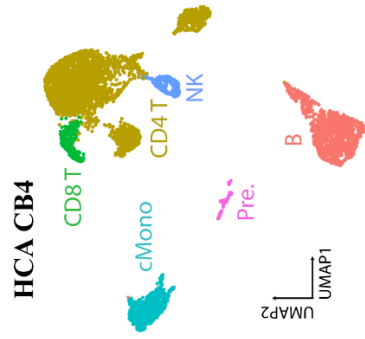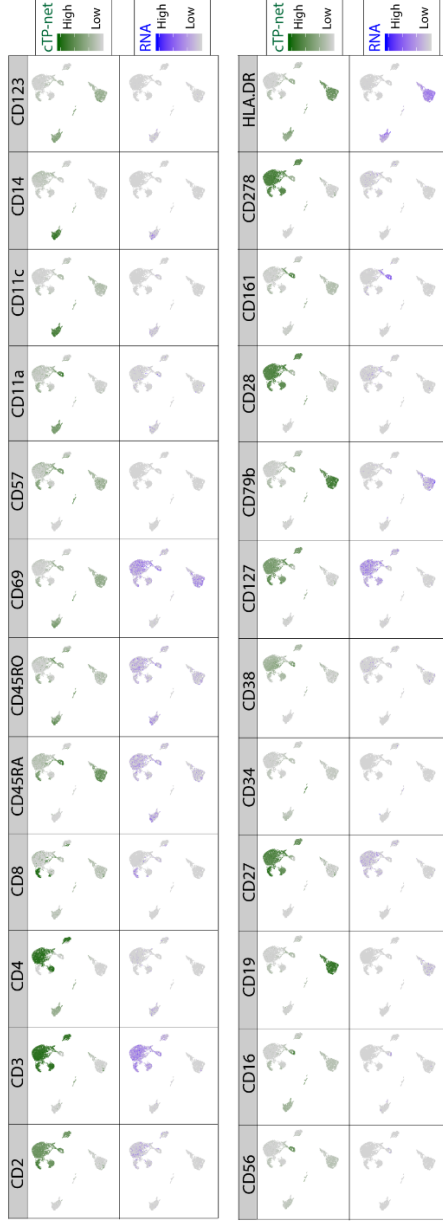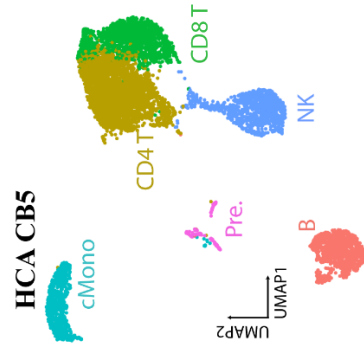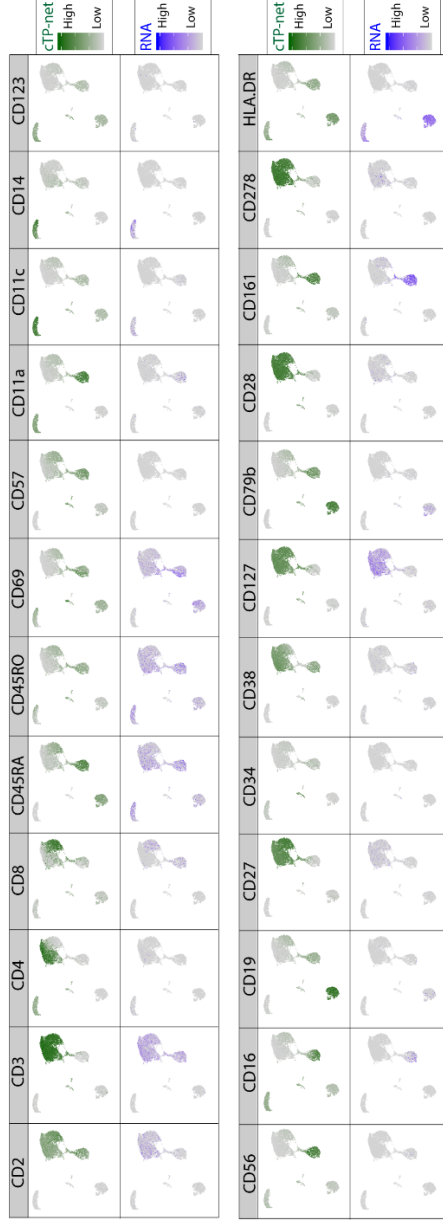

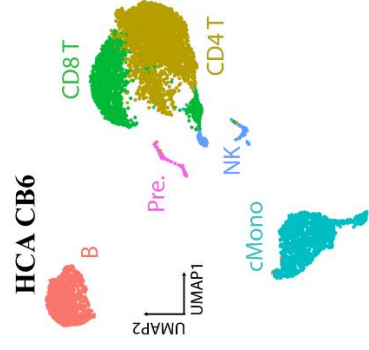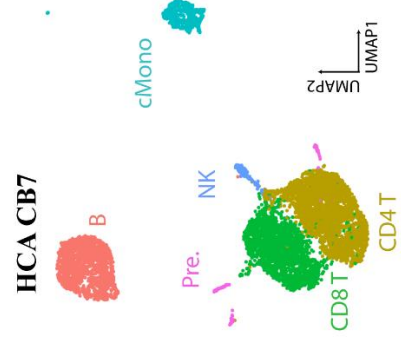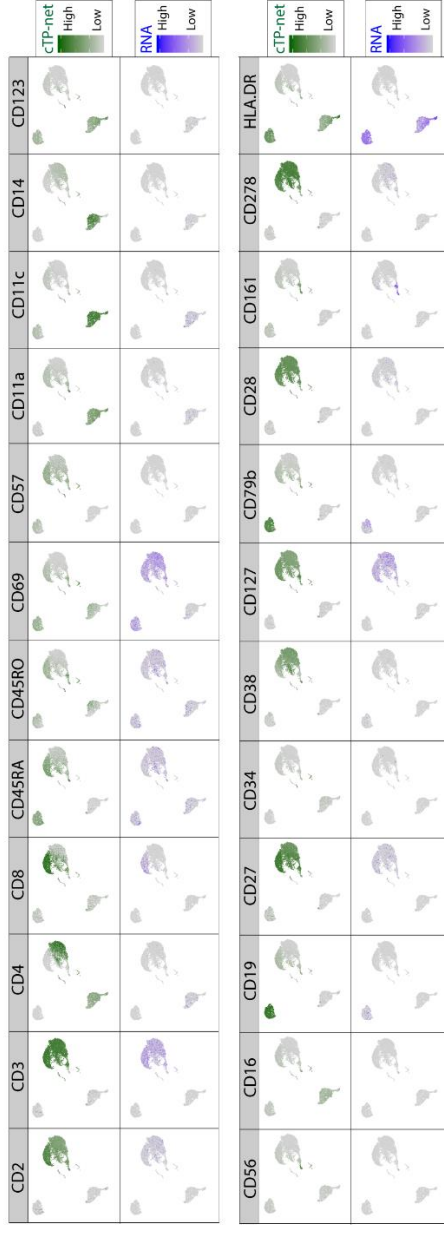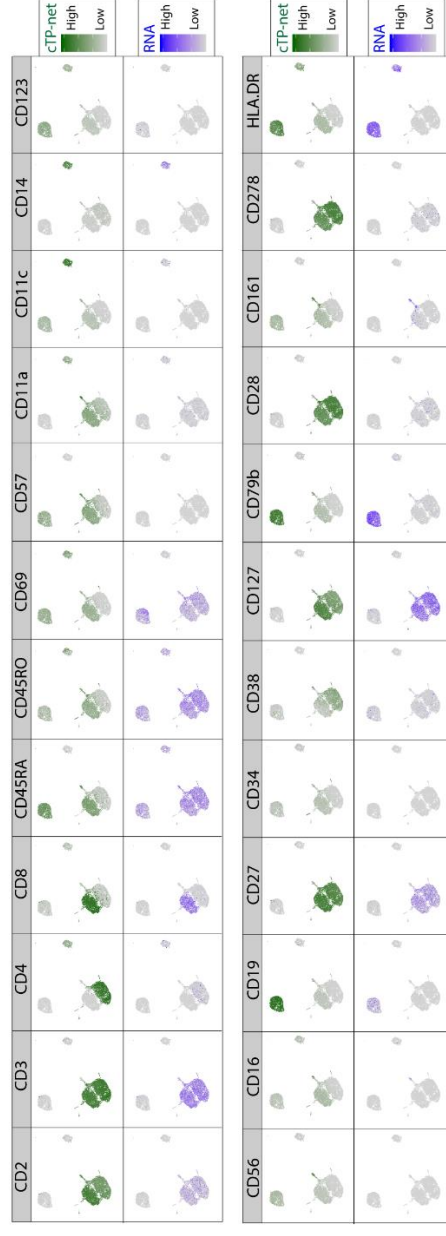

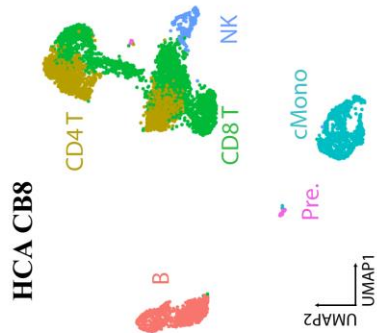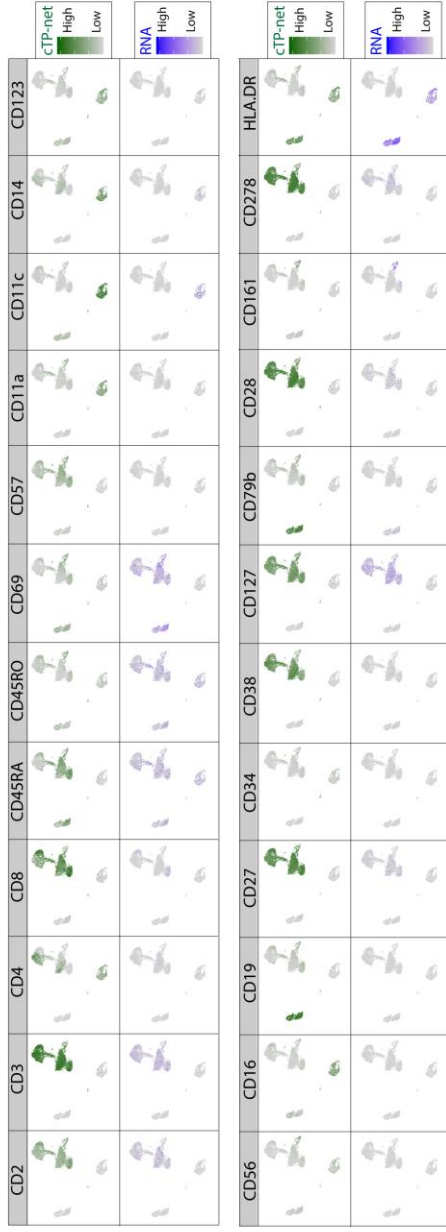

Supplementary Figure 8

cTP-net prediction on Human Cell Atlas CBMCs by individual.

For each individual, we show (1) t-SNE visualization of HCA CBMCs based on expression. B: B cells; CD4 T: CD4 T cells; CD8 T: CD8 T cells; cMono: classic Monocyte; NK: Natural killer cells; Pre.: Precursors. (2) cTP-net imputed protein abundance and RNA of its cognate gene across 24 different surface proteins.



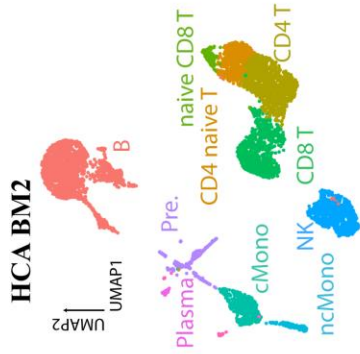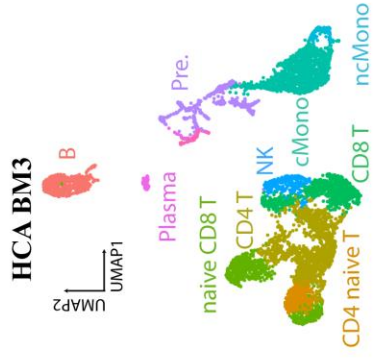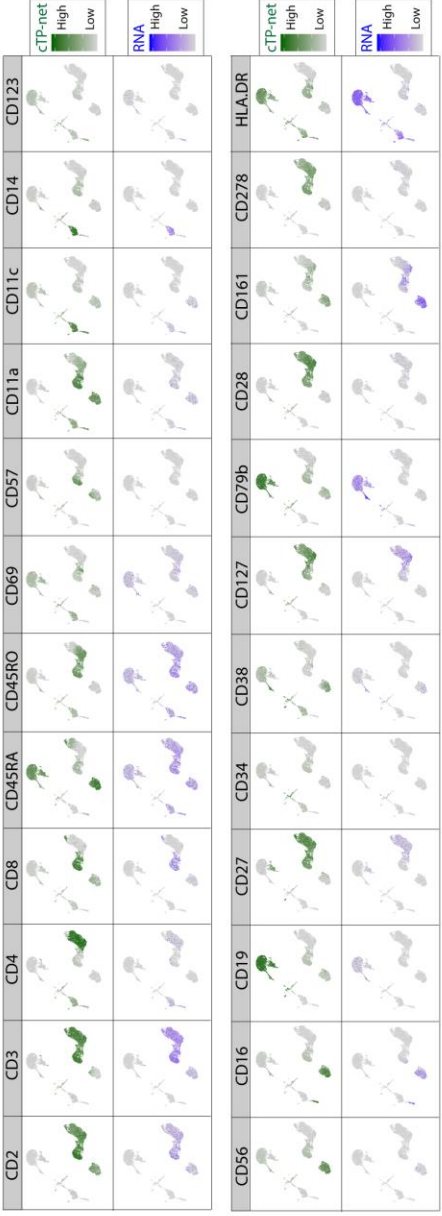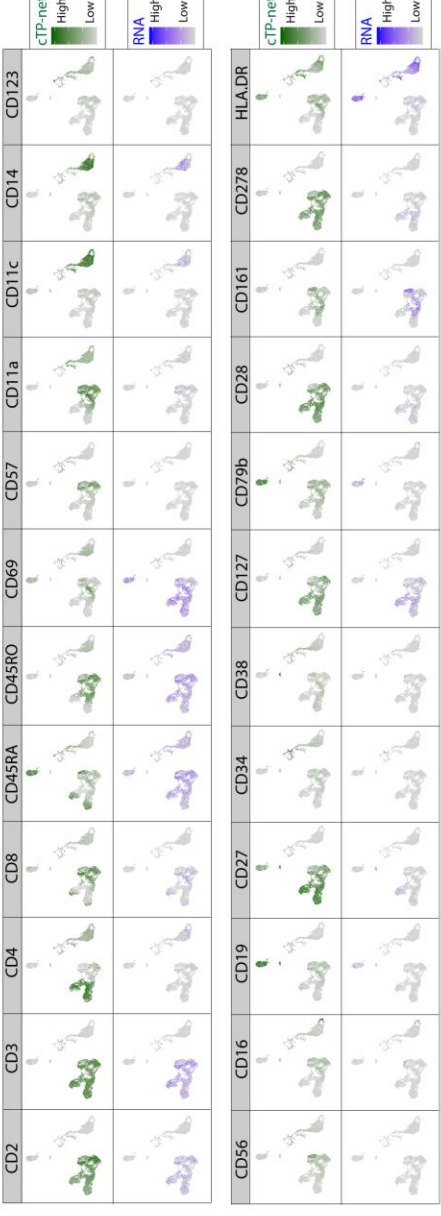

### HCA BM4

CD4 naive T CD4 T NK  
naive CD8 T CD8 T

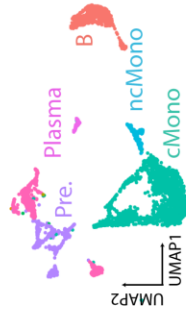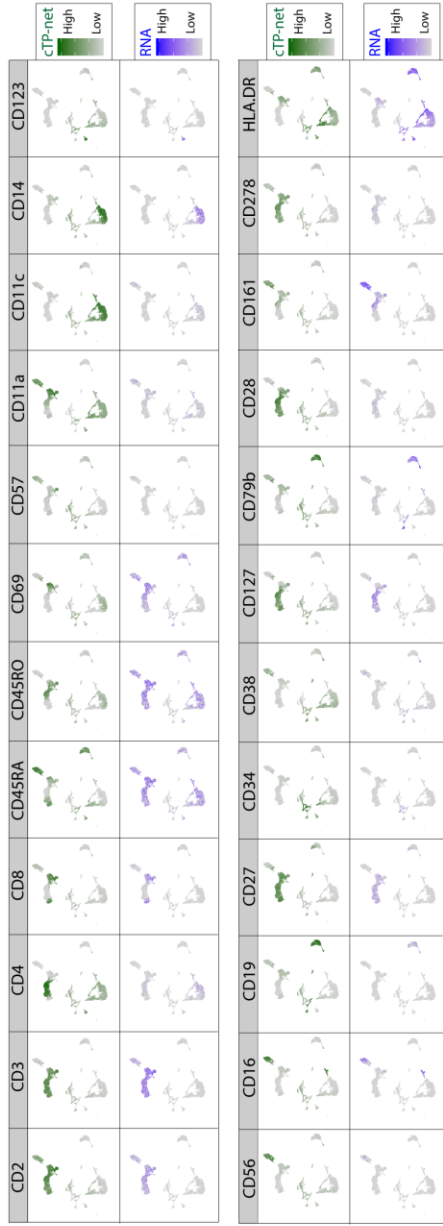

### HCA BM5

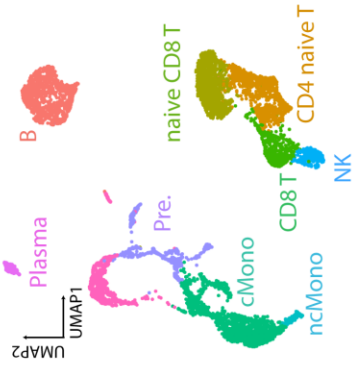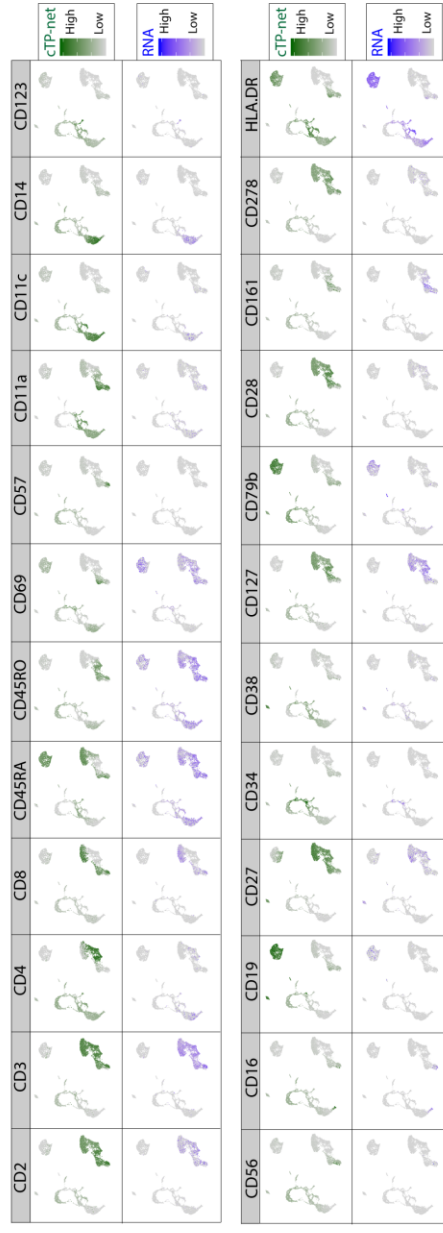

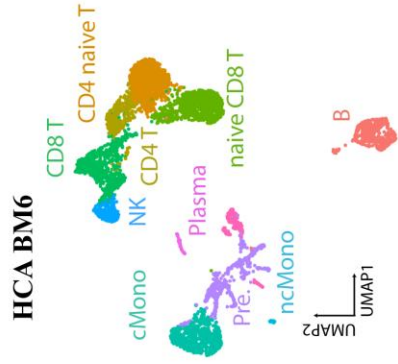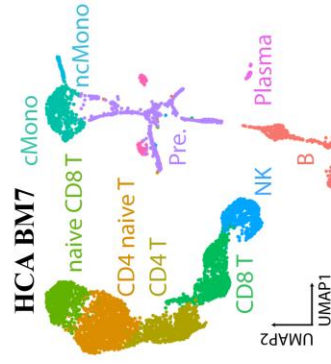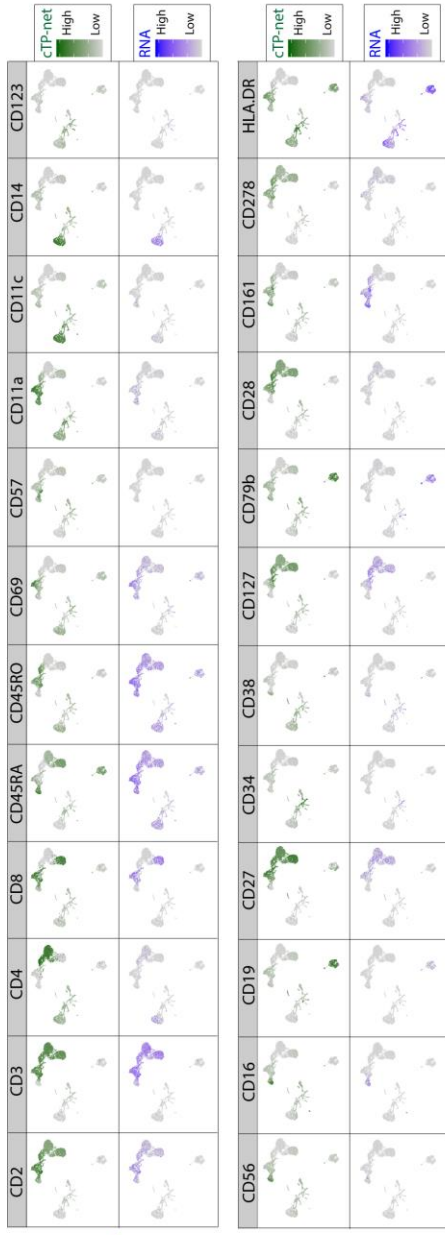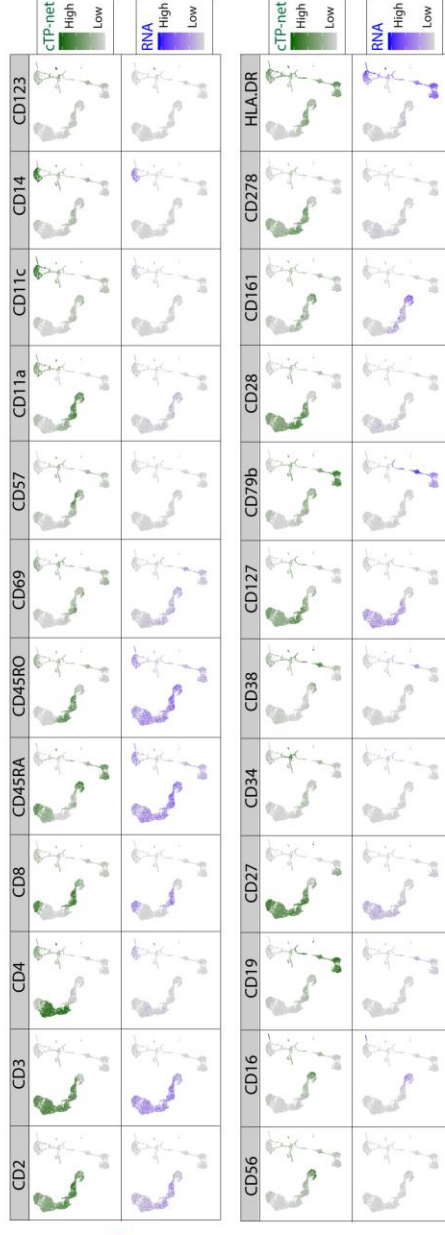

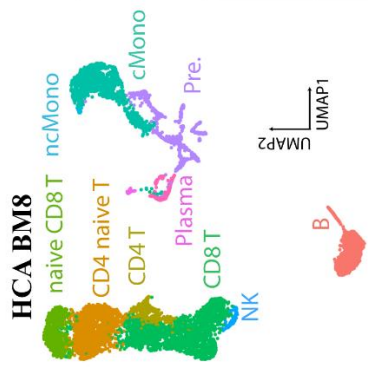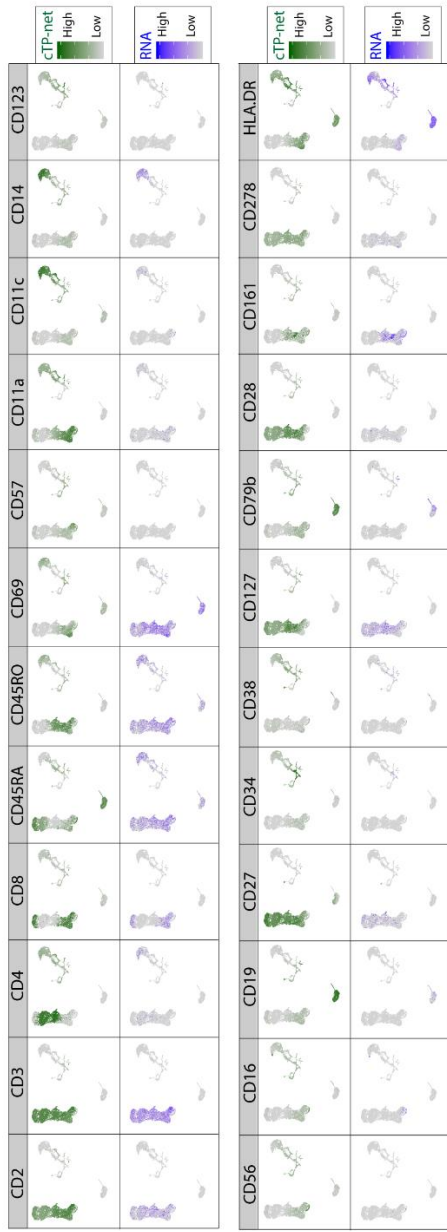

Supplementary Figure 9

cTP-net prediction on Human Cell Atlas BMMCs by individual.

For each individual, we show (1) t-SNE visualization of HCA BMMCs based on expression. B: B cells; CD4 T: CD4 T cells; CD8 T: CD8 T cells; Mono: Monocyte; NK: Natural killer cells; Pre.: Precursors. (2) cTP-net imputed protein abundance and RNA of its cognate gene across 12 different surface proteins.

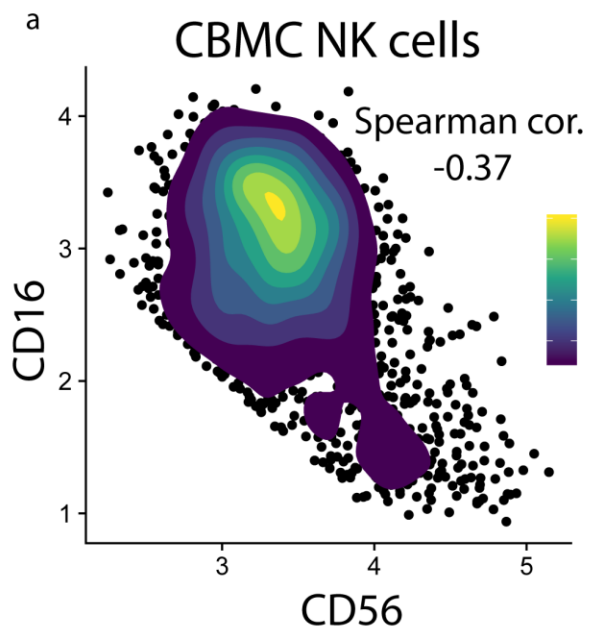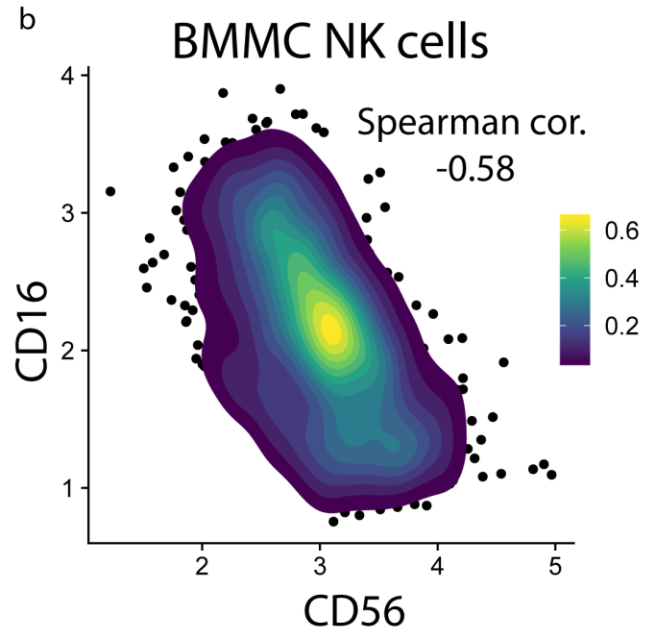

Supplementary Figure 10

Contour plot of cells based on imputed CD56 and CD16 abundance in NK cell populations.

(a) NK cells across all samples from HCA CBMC. (b) NK cells across all samples from HCA BMMC. Strong negative correlation with two subpopulation observed.

a **AML data - Transcriptome**

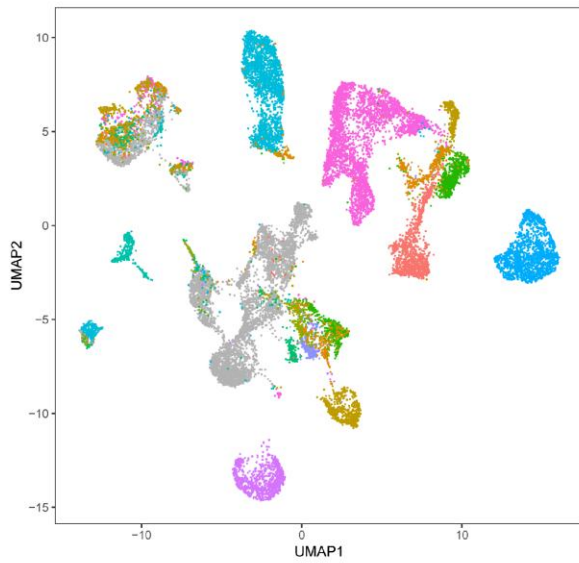

b **AML data - Immunophenotype**

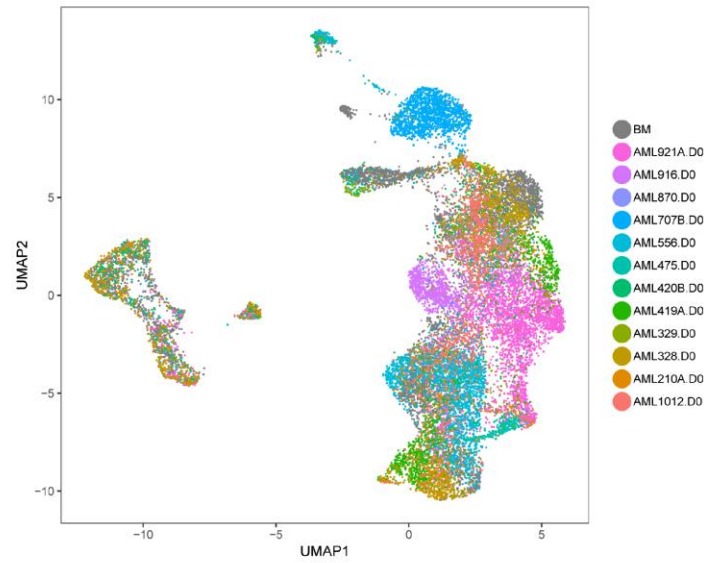

Supplementary Figure 11

UMAP plots of AML data set, colored by samples.

(a) Dimension reduction on transcriptome (RNAs). (b) Dimension reduction on imputed surface proteins.

Supplementary Note. cTP-net models tested on CITE-seq CBMC data sets

Supplementary Table 5 illustrates the different models we have tested. The first column indicates the differences to the finalized models, while the second column shows the correlation of the predicted protein abundance to the true protein abundance in the holdout setting on CITE-seq CBMC data set. As shown by Supplementary Table 5, missing any component of the final model will result in inferior performance.



Supplementary Table 1. Summary table of five data sets analyzed in this study

| Data      | Technology | Cell population | # of subjects | # of cells | # of genes | # of proteins | # of cell types |
|-----------|------------|-----------------|---------------|------------|------------|---------------|-----------------|
| CITE-PBMC | CITE-seq   | PBMC            | 1             | 7667       | 13517      | 10            | 8               |
| CITE-CBMC | CITE-seq   | CBMC            | 1             | 8005       | 14505      | 10            | 12              |
| REAP-PBMC | REAP-seq   | PBMC            | 1             | 4326       | 10811      | 10            | NA              |
| CITE-BMMC | CITE-seq   | BMMC            | 1             | 33455      | 17009      | 25            | NA              |
| HCA-CBMC  | 10x        | CBMC            | 8             | 260,000    | 12611      | NA            | NA              |
| HCA-BMMC  | 10x        | BMMC            | 8             | 270,000    | 12611      | NA            | NA              |

Supplementary Table 2. Cell type summary of CITE-seq data sets

| Data             | Cell types                                                                  |
|------------------|-----------------------------------------------------------------------------|
| <b>CITE-PBMC</b> | B, CD8 T-1, CD4 T, NK, DC,<br>CD14+CD16+ Mono, CD14-CD16+ Mono, CD8 T 2     |
| <b>CITE-CBMC</b> | B, CD8 T, CD4 T, NK, DC, CD14+ Mono, CD16+ Mono, pDC, CD34+, Eryth, Unknown |

Supplementary Table 3. Top 20 highest influence score genes for each protein in CITE-PBMC data set

| CD3                 | CD4                  | CD8                  | CD2                 | CD45RA             | CD57                 | CD16                 | CD14            | CD11c               | CD19              |
|---------------------|----------------------|----------------------|---------------------|--------------------|----------------------|----------------------|-----------------|---------------------|-------------------|
| <i>CD3D</i>         | <i>CD8B</i>          | <i>CD8B</i>          | <i>CCL5</i>         | <i>KLRB1</i>       | <i>NUDT6</i>         | <i>CHL1</i>          | <i>C1orf115</i> | <i>CFD</i>          | <i>CCL5</i>       |
| <i>IL7R</i>         | <i>CD8A</i>          | <i>CD8A</i>          | <i>IL7R</i>         | <i>CCL5</i>        | <i>MZT2A</i>         | <i>RP11-242C19.2</i> | <i>PEAK1</i>    | <i>MAL</i>          | <i>CD8B</i>       |
| <i>CD8B</i>         | <i>RP11-291B21.2</i> | <i>CCL5</i>          | <i>RP4-539M6.22</i> | <i>EIF1AX</i>      | <i>ATP2A2</i>        | <i>GCSH</i>          | <i>ALDH7A1</i>  | <i>ANKRD36C</i>     | <i>RN7SL600P</i>  |
| <i>FCER1G</i>       | <i>CCL5</i>          | <i>TRDC</i>          | <i>LTV1</i>         | <i>CD7</i>         | <i>IQCE</i>          | <i>NRL</i>           | <i>CYBB</i>     | <i>BLOC1S3</i>      | <i>MYO1D</i>      |
| <i>TRDC</i>         | <i>NCR3</i>          | <i>RP11-291B21.2</i> | <i>RP11-452L6.5</i> | <i>TST</i>         | <i>PKNOX1</i>        | <i>DBF4</i>          | <i>ISYNA1</i>   | <i>IGLL5</i>        | <i>HSF2</i>       |
| <i>AKR7A2</i>       | <i>KLRB1</i>         | <i>CHMP7</i>         | <i>FBXO10</i>       | <i>MFSD7</i>       | <i>FBXW8</i>         | <i>SPHK2</i>         | <i>LMAN1</i>    | <i>RP11-159G9.5</i> | <i>AC142528.1</i> |
| <i>HELLS</i>        | <i>DDIT3</i>         | <i>ZAP70</i>         | <i>LINC00384</i>    | <i>ZFAS1</i>       | <i>CTA-217C2.1</i>   | <i>CDKL1</i>         | <i>FAM162A</i>  | <i>ARMCX1</i>       | <i>DNAJA3</i>     |
| <i>ALG10</i>        | <i>CTD-2547L16.1</i> | <i>BMP8B</i>         | <i>ACAP2</i>        | <i>TAPSAR1</i>     | <i>CNOT11</i>        | <i>TIMM21</i>        | <i>SLC4A7</i>   | <i>SLC6A16</i>      | <i>GLB1L</i>      |
| <i>FGD5-AS1</i>     | <i>C18orf25</i>      | <i>FAH</i>           | <i>PPCDC</i>        | <i>PLEKHF1</i>     | <i>HSD17B4</i>       | <i>MRPS18C</i>       | <i>MIER3</i>    | <i>LRRC16A</i>      | <i>LIMD2</i>      |
| <i>COMMD7</i>       | <i>FPGT</i>          | <i>AC009299.3</i>    | <i>ANKRD39</i>      | <i>CTBP1-AS2</i>   | <i>CLEC4E</i>        | <i>C7orf43</i>       | <i>SLC11A2</i>  | <i>TRAF1</i>        | <i>DTX3L</i>      |
| <i>CTA-292E10.8</i> | <i>NETO2</i>         | <i>CMKLR1</i>        | <i>AIM2</i>         | <i>CYP27A1</i>     | <i>FAM98C</i>        | <i>GORASP2</i>       | <i>ZAP70</i>    | <i>PABPN1</i>       | <i>PTCD2</i>      |
| <i>ZC2HC1A</i>      | <i>GDAP1</i>         | <i>ENTPD1</i>        | <i>TTLL12</i>       | <i>MAN1A2</i>      | <i>PRMT1</i>         | <i>CTD-2555C10.3</i> | <i>MAP4</i>     | <i>ADM</i>          | <i>LPAR1</i>      |
| <i>INADL</i>        | <i>CSTF1</i>         | <i>PIK3CA</i>        | <i>GABBR1</i>       | <i>FAM115C</i>     | <i>SLC25A11</i>      | <i>LEPROT</i>        | <i>TTY15</i>    | <i>KIAA0319L</i>    | <i>ZNF649</i>     |
| <i>SHISA4</i>       | <i>RP11-159H10.3</i> | <i>WDR7</i>          | <i>DCUN1D4</i>      | <i>CST3</i>        | <i>TCEANC2</i>       | <i>RUSC1</i>         | <i>HS1BP3</i>   | <i>MRPL4</i>        | <i>HLA-DRB5</i>   |
| <i>DCAF4</i>        | <i>RP11-451M19.3</i> | <i>HEG1</i>          | <i>CPD</i>          | <i>NAIF1</i>       | <i>LCTL</i>          | <i>POLR2L</i>        | <i>PRPSAP1</i>  | <i>NDRG1</i>        | <i>LIN54</i>      |
| <i>HPGDS</i>        | <i>ENTPD1-AS1</i>    | <i>NPAT</i>          | <i>RAPGEFL1</i>     | <i>RP11-83N9.5</i> | <i>CAPN1</i>         | <i>RP11-85A1.3</i>   | <i>ZBTB38</i>   | <i>FAM63A</i>       | <i>USP32</i>      |
| <i>PACSIN1</i>      | <i>SLC4A10</i>       | <i>7-Sep</i>         | <i>U91328.20</i>    | <i>FCGR3A</i>      | <i>VPS26A</i>        | <i>FKBP7</i>         | <i>PIK3R1</i>   | <i>RPL34</i>        | <i>AIM2</i>       |
| <i>ARID4B</i>       | <i>FAAH2</i>         | <i>CDT1</i>          | <i>EIF4H</i>        | <i>CCDC163P</i>    | <i>ECHS1</i>         | <i>RNF24</i>         | <i>PIGG</i>     | <i>FAM118B</i>      | <i>SLC12A7</i>    |
| <i>ATP11A</i>       | <i>AP5B1</i>         | <i>QRICH1</i>        | <i>AC073115.7</i>   | <i>POLR1C</i>      | <i>FLVCR1-AS1</i>    | <i>TBXAS1</i>        | <i>DESI2</i>    | <i>UBQLN4</i>       | <i>ZNF671</i>     |
| <i>RN7SL521P</i>    | <i>DHPS</i>          | <i>AP2M1</i>         | <i>RP11-401.2</i>   | <i>PRSS35</i>      | <i>RP11-421L21.2</i> | <i>WDR83</i>         | <i>SIRT5</i>    | <i>FKBP15</i>       | <i>TNNI2</i>      |

Supplementary Table 4. Gene set enrichment analysis on cell-immunophenotype pairs that cTP-net predict well in CITE-PBMC data set

| Surface protein | Cell type      | GO pathways                                                    |
|-----------------|----------------|----------------------------------------------------------------|
| CD45RA          | CD14-CD16+Mono | GO_CATABOLIC_PROCESS                                           |
|                 |                | GO_PROTEIN_LOCALIZATION                                        |
|                 |                | GO_REGULATION_OF_CELLULAR_COMPONENT_BIOGENESIS                 |
|                 |                | GO_CELLULAR_RESPONSE_TO_STRESS                                 |
|                 |                | GO_CELLULAR_RESPONSE_TO_DNA_DAMAGE_STIMULUS                    |
|                 |                | GO_RNA_BINDING                                                 |
|                 |                | GO_ESTABLISHMENT_OF_LOCALIZATION_IN_CELL                       |
|                 |                | GO_CELL_CYCLE                                                  |
|                 |                | GO_SINGLE_ORGANISM_BIOSYNTHETIC_PROCESS                        |
|                 |                | GO_CELLULAR_MACROMOLECULE_LOCALIZATION                         |
| CD11c           | CD14-CD16+Mono | GO_CELLULAR_RESPONSE_TO_STRESS                                 |
|                 |                | GO_NEGATIVE_REGULATION_OF_GENE_EXPRESSION                      |
|                 |                | GO_POSITIVE_REGULATION_OF_BIOSYNTHETIC_PROCESS                 |
|                 |                | GO_POSITIVE_REGULATION_OF_GENE_EXPRESSION                      |
|                 |                | GO_CELL_CYCLE                                                  |
|                 |                | GO_POSITIVE_REGULATION_OF_PROTEIN_METABOLIC_PROCESS            |
|                 |                | GO_NEGATIVE_REGULATION_OF_NITROGEN_COMPOUND_METABOLIC_PROCESS  |
|                 |                | GO_CYTOSKELETON                                                |
|                 |                | GO_CHROMOSOME                                                  |
|                 |                | GO_ENZYME_BINDING                                              |
| CD45RA          | CD8 T 2        | GO_ENZYME_BINDING                                              |
|                 |                | GO_RNA_BINDING                                                 |
|                 |                | GO_RIBONUCLEOPROTEIN_COMPLEX                                   |
|                 |                | GO_REGULATION_OF_TRANSCRIPTION_FROM_RNA_POLYMERASE_II_PROMOTER |
|                 |                | GO_CELL_CYCLE                                                  |
|                 |                | GO_RNA_PROCESSING                                              |
|                 |                | GO_POSITIVE_REGULATION_OF_BIOSYNTHETIC_PROCESS                 |
|                 |                | GO_CYTOSKELETON                                                |
|                 |                | GO_RIBONUCLEOTIDE_BINDING                                      |
|                 |                | GO_POSITIVE_REGULATION_OF_GENE_EXPRESSION                      |
| CD45RA          | CD4 T          | GO_REGULATION_OF_IMMUNE_SYSTEM_PROCESS                         |
|                 |                | GO_IMMUNE_SYSTEM_PROCESS                                       |
|                 |                | GO_VACUOLE                                                     |
|                 |                | GO_SMALL_MOLECULE_METABOLIC_PROCESS                            |
|                 |                | GO_ORGANONITROGEN_COMPOUND_METABOLIC_PROCESS                   |
|                 |                | GO_ESTABLISHMENT_OF_LOCALIZATION_IN_CELL                       |
|                 |                | GO_POSITIVE_REGULATION_OF_MULTICELLULAR_ORGANISMAL_PROCESS     |
|                 |                | GO_ENDOPLASMIC_RETICULUM                                       |

|                                                                   |                 |                                                                |
|-------------------------------------------------------------------|-----------------|----------------------------------------------------------------|
|                                                                   |                 | GO_REGULATION_OF_TRANSCRIPTION_FROM_RNA_POLYMERASE_II_PROMOTER |
|                                                                   |                 | GO_PROTEIN_LOCALIZATION                                        |
| CD11c                                                             | CD14+CD16+ Mono | GO_POSITIVE_REGULATION_OF_GENE_EXPRESSION                      |
|                                                                   |                 | GO_DNA_REPLICATION                                             |
|                                                                   |                 | GO_POSITIVE_REGULATION_OF_MOLECULAR_FUNCTION                   |
|                                                                   |                 | GO_POSITIVE_REGULATION_OF_BIOSYNTHETIC_PROCESS                 |
|                                                                   |                 | GO_SINGLE_ORGANISM_BIOSYNTHETIC_PROCESS                        |
|                                                                   |                 | GO_DNA_DEPENDENT_DNA_REPLICATION                               |
|                                                                   |                 | GO_PHOSPHATE_CONTAINING_COMPOUND_METABOLIC_PROCESS             |
|                                                                   |                 | GO_CELL_JUNCTION                                               |
|                                                                   |                 | GO_CYTOKINE_RECEPTOR_BINDING                                   |
|                                                                   |                 | GO_ORGANONITROGEN_COMPOUND_BIOSYNTHETIC_PROCESS                |
| CD45RA                                                            | DC              | GO_NEGATIVE_REGULATION_OF_NITROGEN_COMPOUND_METABOLIC_PROCESS  |
|                                                                   |                 | GO_POLY_A_RNA_BINDING                                          |
|                                                                   |                 | GO_CHROMOSOME_ORGANIZATION                                     |
|                                                                   |                 | GO_REGULATION_OF_DNA_METABOLIC_PROCESS                         |
|                                                                   |                 | GO_RNA_BINDING                                                 |
|                                                                   |                 | GO_MACROMOLECULAR_COMPLEX_BINDING                              |
|                                                                   |                 | GO_PHOSPHATE_CONTAINING_COMPOUND_METABOLIC_PROCESS             |
|                                                                   |                 | GO_NEGATIVE_REGULATION_OF_GENE_EXPRESSION                      |
|                                                                   |                 | GO_ESTABLISHMENT_OF_LOCALIZATION_IN_CELL                       |
| GO_DNA_METABOLIC_PROCESS                                          |                 |                                                                |
| CD11c                                                             | DC              | GO_ENZYME_BINDING                                              |
|                                                                   |                 | GO_RIBONUCLEOTIDE_BINDING                                      |
|                                                                   |                 | GO_ESTABLISHMENT_OF_LOCALIZATION_IN_CELL                       |
|                                                                   |                 | GO_NEGATIVE_REGULATION_OF_PROTEIN_METABOLIC_PROCESS            |
|                                                                   |                 | GO_IMMUNE_SYSTEM_PROCESS                                       |
|                                                                   |                 | GO_ORGANONITROGEN_COMPOUND_BIOSYNTHETIC_PROCESS                |
|                                                                   |                 | GO_PHOSPHATE_CONTAINING_COMPOUND_METABOLIC_PROCESS             |
|                                                                   |                 | GO_PHOSPHORYLATION                                             |
|                                                                   |                 | GO_NEGATIVE_REGULATION_OF_PROTEIN_MODIFICATION_PROCESS         |
| GO_TRANSFERASE_ACTIVITY_TRANSFERRING_PHOSPHORUS_CONTAINING_GROUPS |                 |                                                                |

Supplementary Table 5. Summary table of different cTP-net models

| <b>Differences to the finalized model</b>               | <b>Correlation</b>  |
|---------------------------------------------------------|---------------------|
| Without SAVER-X denoising, without MB structure         | 0.961±0.0004        |
| Without MB structure                                    | 0.968±0.0005        |
| Without SAVER-X denoising                               | 0.959 ±0.0005       |
| L2 loss                                                 | 0.969±0.0002        |
| Set bottle neck layer to 256 nodes (128 in final model) | 0.968±0.0003        |
| Set bottle neck layer to 64 nodes (128 in final model)  | 0.968±0.0003        |
| With additional shared layers                           | 0.969±0.0004        |
| With SeLU activation function                           | 0.966±0.0002        |
| With Dropout layer between layer1 and layer2            | 0.966±0.001         |
| Exclude genes corresponding to targeted proteins        | 0.967±0.0001        |
| <b>Final model</b>                                      | <b>0.970±0.0003</b> |

Supplementary Table 6. List of surface proteins and corresponding genes

| <b>Surface protein</b> | <b>Corresponding gene</b>        |
|------------------------|----------------------------------|
| CD3                    | <i>CD3D,CD3E,CD3G,CD247</i>      |
| CD4                    | <i>CD4</i>                       |
| CD8                    | <i>CD8A,CD8B</i>                 |
| CD45RA                 | <i>PTPRC</i>                     |
| CD56                   | <i>NCAM1</i>                     |
| CD2                    | <i>CD2</i>                       |
| CD16                   | <i>FCGR3A</i>                    |
| CD11c                  | <i>ITGAX</i>                     |
| CD14                   | <i>CD14</i>                      |
| CD19                   | <i>CD19</i>                      |
| CD34                   | <i>CD34</i>                      |
| CD57                   | <i>B3GAT1</i>                    |
| CD11a                  | <i>ITGAL</i>                     |
| CD123                  | <i>IL3RA</i>                     |
| CD127                  | <i>IL7R</i>                      |
| CD161                  | <i>KLRB1</i>                     |
| CD27                   | <i>CD27</i>                      |
| CD278                  | <i>ICOS</i>                      |
| CD28                   | <i>CD28</i>                      |
| CD38                   | <i>CD38</i>                      |
| CD45RO                 | <i>PTPRC</i>                     |
| CD69                   | <i>CD69</i>                      |
| CD79b                  | <i>CD79B</i>                     |
| HLR.DR                 | <i>HLA-DRA,HLA-DRB1,HLA-DRB5</i> |
